# Supplementary material
Source: Research Square preprint supplement (doi:10.21203/rs.3.rs-9066353/v1)
Supplement: Supplementary file 1 [file 78d64112724c10e8f8357f84.docx]

**Supplementary Material**

**Samples characteristics**

**Brazilian sample**

The Brazilian sample consisted of 133 youth self-reports (Mean age = 11.0 years, SD = 1.6, range = 8–17; 54.1% female) recruited through convenience sampling from one public and one private school in Aracaju, Sergipe, Northeast Brazil. Public school students were primarily from low socioeconomic backgrounds, whereas private school students were from middle socioeconomic backgrounds, based on school records. All participants completed the ARI during regular class periods after research assistants explained the study objectives and procedures. Beyond age and sex school type was the only demographic variable recorded [9]. This study was approved by the Ethics Committee of the Institute of Psychology of Universidade Federal do Rio Grande do Sul (protocol no. 22264). School approval, parental written informed consent, and youth assent were obtained prior to participation. This study is part of a larger project [10].

**Chinese sample**

The Chinese sample consisted of 395 youth self-reports and 403 caregiver reports (Mean age = 13.4 years, SD = 2.5, range = 9–17; 48.1% female). Participants were recruited through convenience sampling from schools in four geographically diverse cities in mainland China as part of a community mental health questionnaire project. The ARI, translated into Simplified Chinese and back-translated with authorization from the original author, was administered online via wjx.cn. Caregivers and youth completed the questionnaires online using separate devices (e.g., computers and/or mobile phones) in a back-to-back manner to ensure independent responding. The study was approved by the Ethics Committee of the Institute of Psychology, Chinese Academy of Sciences (approval no. H22076). Written informed consent was obtained from all caregivers, and assent was obtained from all youth participants. Given widespread access to internet-connected devices and familiarity with online learning platforms, online participation was feasible and supported compliance. Most participants were Han and resided in urban areas, and parents were generally college-educated with middle-range household income levels [23].

**Japanese sample**

The Japanese sample consisted of 4,800 caregiver reports (Mean age = 47.22 years, SD = 3.95, range = 39-55; 32% female) collected from parents registered with a national online survey company [33]. Parents of children in grades 1–12 were invited to complete an online ARI survey. Data were collected in evenly distributed grade-by-sex segments (200 per grade/sex cell). Information on parent education, household income, marital status, and child grade is provided elsewhere [33]. This study received approval from the Shinshu University Ethics Committee on Educational Research prior to data collection (Approval No. 19-33). All participants provided informed consent electronically before completing the survey.

**Spanish sample**

The Spanish sample consisted of 384 youth self-reports (Mean age = 12.83 years, SD = 0.31, range = 12.09–13.52; 52.6% female) collected in Barcelona, Spain, as part of a longitudinal community study of child behavioral problems [13]. Participants were drawn from schools in the Barcelona area following a two-phase design. They completed the Catalan version of the ARI during study visits. Most participants were of Spanish origin and Caucasian background, spanning a range of socioeconomic levels typical of the region. The project was approved by the Ethics Committee on Animal and Human Experimentation of the Universitat Autònoma de Barcelona (Spain). Families who met screening criteria and gave their consent to participate in the study were assessed annually.

**United States sample**

The US sample consisted of 467 youth self-reports and 475 caregiver reports collected at the age 12 wave of a longitudinal study (Mean age = 12.7, SD = 0.5, range = 11–14; 47.2% female). A major goal of this longitudinal study is to trace developmental pathways from parental emotional disorders and early child temperament, reflecting positive and negative valence systems, to neural indices of emotional information processing and the subsequent emergence of depressive and anxiety symptoms and disorders across development. Families were originally recruited from the community using commercial mailing lists when children were age 3 and followed at 3-year intervals through adolescence [20]. The ARI was administered during a laboratory visit at age 12. Youth completed the measure on site using paper-and-pencil questionnaires, and caregivers completed the parallel parent-report version during the same laboratory visit using the same format. The sample was primarily middle-income. This study was approved by the Stony Brook University Institutional Review Board (protocol no. 88933). Written informed consent was obtained from caregivers, and assent was obtained from youth.

**Supplementary Methods: Statistical Analyses**

All confirmatory factor analyses were conducted using the weighted least squares mean and variance adjusted estimator (WLSMV) with a probit link function, which is recommended for ordered categorical indicators such as ARI items [22].

Model fit was evaluated using multiple indices, including the Comparative Fit Index (CFI), Tucker–Lewis Index (TLI), and Root Mean Square Error of Approximation (RMSEA) [3, 17]. Models were considered to demonstrate acceptable fit if CFI and TLI exceeded 0.90 and RMSEA was below 0.08, and good fit if CFI and TLI exceeded 0.95 and RMSEA was below 0.06, consistent with recommended guidelines.

Measurement invariance analyses were conducted using a multiple-group CFA framework with Delta parameterization for categorical indicators. Four increasingly restrictive levels of invariance were evaluated:

1. Configural invariance, in which the same factor structure was specified across countries with thresholds and loadings freely estimated.
2. Threshold invariance, in which item thresholds were constrained across groups.
3. Threshold and loading invariance, testing whether items relate to the latent construct similarly across countries.
4. Threshold, loading, and intercept invariance, which additionally tests whether observed responses correspond to equivalent levels of the latent construct across groups and allows meaningful comparison of latent means.

Because ARI items are binary or ternary, threshold invariance is statistically equivalent to the configural model [39]. Therefore, invariance testing focused on comparisons between the configural model and the threshold and loading invariance model, and between the threshold and loading invariance model and the threshold, loading, and intercept invariance model.

Model comparisons relied primarily on changes in alternative fit indices due to the sensitivity of chi-square difference testing to sample size. Specifically, decreases in CFI of 0.010 or less, increases in RMSEA of 0.015 or less, and increases in standardized root mean square residual (SRMR) of 0.010 or less were considered evidence of invariance [5, 6]. Chi-square difference tests are reported for completeness.

Modification indices were examined to identify potential sources of model misfit or non-invariance, with values of 10 or greater used as a threshold for follow-up inspection.

**Supplementary Results**

| **Supplementary Table 1. Summary of Deviations Between Preregistered and Implemented Analyses** | | |
| --- | --- | --- |
| **Preregistered Plan** | **Implemented Analysis** | **Rationale / Notes** |
| **Included samples**: Parent and youth data from US, Brazil, Spain, China, Japan (N≈8,331). | Parent: China, Japan, US; Youth: Brazil, China, Spain, US (N=6,195). | Japanese youth ARI unavailable; Brazilian data limited to Aracaju sample (n=133); US limited to age-12 wave. |
| **Training/test split**: 200 participants per country in training set; remaining in test set. | No split; analyses conducted on full available sample. | Brazil and other countries had n < 200; full sample improves model stability and comparability. |
| **Measurement invariance levels**: Configural, metric, scalar (continuous assumption). | Configural, threshold, threshold+loading, threshold+loading+intercept (categorical framework, Delta parameterization). | Adjusted to categorical specification of ARI items (Wu & Estabrook 2016). |
| **Model sequence**: Invariance only. | Step 1: Single-factor CFA per country/informant. Step 2: Multi-group CFA (MI). | Added initial CFAs to evaluate factor structure and reliability prior to MI testing. |
| **Item scaling**: 3-level ordinal items (0–2). | Parent: 3-level (China, Japan); 2-level (China, Japan, US) due to sparse cells. Youth: both 3- and 2-level for comparability. | US parents never endorsed “2”; dichotomization necessary for model convergence. |
| **Model constraints**: No post-hoc adjustments. | In Spanish youth CFA, correlated residual added between items 2 (“Often loses temper”) and 6 (“Loses temper easily”). | Large modification index; items share semantic overlap; improved model fit. |
| **Reliability criterion**: McDonald’s ω > 0.70. | McDonald’s ω computed per informant/country; all ≥ .80 except Spain-youth (ω = .73). | Matches preregistration; minor deviation due to lower reliability in one subsample. |
| **Mean comparison model**: Linear mixed-effects with informant, age, sex. | Separate linear regressions by informant (parent vs. youth). | Informant sets differed across countries; separate models provided clearer estimation. |
| **Multiple-comparison correction**: Bonferroni “if applicable.” | No Bonferroni; report exact *p* values; MI assessed by fit indices (ΔCFI, ΔRMSEA). | Analyses theory-driven; MI based on fit statistics, not multiple *p*-tests. |
| **Data exclusion**: None; listwise deletion if minimal missingness. | Complete-case analyses; no additional exclusions. | Matches preregistration. |

| **Table 2. Descriptive Statistics for ARI Items for Parent and Youth Report** | | | | | | | |
| --- | --- | --- | --- | --- | --- | --- | --- |
|  |  | **Brazil** | **China** | **Japan** | **Spain** | **US** |  |
| n | | 133 | 403/395 | 4,800 | 384 | 475/467 |  |
| **Parent Report** |  | **Brazil** | **China** | **Japan** | **Spain** | **US** |  |
| **Item and score** |  | % | % | % | % | % | Bonferroni corrected *p*-values |
| Annoyed | 0 | - | 40.2 | 62.5 | - | 63.8 | Ch>Jp, US (all *p*<0.001) |
|  | 1 | - | 53.1 | 29.7 | - | 33.1 |
|  | 2 | - | 6.7 | 7.8 | - | 3.2 |
| Often loses temper | 0 | - | 52.6 | 67.1 | - | 77.1 | Ch>Jp>US (all *p*<0.001) |
|  | 1 | - | 39.7 | 24.8 | - | 18.7 |
|  | 2 | - | 7.7 | 8.1 | - | 4.2 |
| Stays angry | 0 | - | 79.4 | 84.1 | - | 94.5 | Ch, Jp>US (all *p*<0.001) |
|  | 1 | - | 19.1 | 12.3 | - | 5.3 |
|  | 2 | - | 1.5 | 3.6 | - | 0.2 |
| Angry most of time | 0 | - | 89.6 | 87.7 | - | 96.6 | Ch, Jp>US (all *p*<0.001 |
|  | 1 | - | 10.2 | 10 | - | 3.4 |
|  | 2 | - | 0.3 | 2.4 | - | 0 |
| Angry frequent | 0 | - | 71.7 | 74.8 | - | 88 | Ch, Jp>US (all *p*<0.001) |
|  | 1 | - | 26.1 | 20.5 | - | 9.9 |
|  | 2 | - | 2.2 | 4.8 | - | 2.1 |
| Loses temper easily | 0 | - | 45.9 | 78.3 | - | 79.2 | Ch>Jp, US (all *p*<0.001) |
|  | 1 | - | 43.9 | 16.6 | - | 16.4 |
|  | 2 | - | 10.2 | 5 | - | 4.4 |
| Irritability problems | 0 | - | 50.1 | 82.3 | - | 87.6 | Ch>US (*p*<0.001); Ch>Jp (*p*<0.001); Jp>US (*p*=0.013) |
|  | 1 | - | 42.2 | 13.8 | - | 9.5 |
|  | 2 | - | 7.7 | 3.9 | - | 3 |
| **Youth Report** |  | **Brazil** | **China** | **Japan** | **Spain** | **US** |  |
| **Item and score** |  | % | % | % | % | % |  |
| Annoyed | 0 | 45.9 | 46.8 | - | 68 | 42.6 | Br, Ch, US>Sp (all *p*<0.001) |
|  | 1 | 39.9 | 48.4 | - | 30.5 | 49.7 |
|  | 2 | 14.3 | 4.8 | - | 1.6 | 7.7 |
| Often lose temper | 0 | 44.4 | 60.8 | - | 60.4 | 71.4 | Br>Ch (*p*<0.001); Br> Sp (*p*<0.001); Br> US (*p*<0.001); Ch>US (*p*=0.011); Sp>US (*p*=0.017) |
|  | 1 | 36.8 | 34.7 | - | 37 | 24.1 |
|  | 2 | 18.8 | 4.6 | - | 2.6 | 4.5 |
| Stay angry | 0 | 45.1 | 77.5 | - | 62.8 | 80 | Br>Sp>Ch, US (all *p*<0.001) |
|  | 1 | 35.3 | 19.5 | - | 33.1 | 18.1 |
|  | 2 | 19.6 | 3 | - | 4.2 | 1.9 |
| Angry most of time | 0 | 69.2 | 91.7 | - | 92.2 | 94.9 | Br >Ch, Sp, US (all *p*<0.001) |
|  | 1 | 18.1 | 7.6 | - | 7.3 | 3.9 |
|  | 2 | 12.8 | 0.8 | - | 0.5 | 1.3 |
| Angry frequent | 0 | 56.4 | 79 | - | 71 | 80.9 | Br>Ch (*p*<0.001); Br>US (*p*<0.001); Br>Sp (*p*=0.001); Sp>US (*p*=0.008 |
|  | 1 | 29.3 | 19.5 | - | 27.2 | 17 |
|  | 2 | 14.3 | 1.5 | - | 1.8 | 2.2 |
| Lose temper easily | 0 | 46.6 | 59.2 | - | 64.8 | 74.4 | Br>Ch (*p*<0.001); Br> Sp (*p*<0.001); Br> US (*p*<0.001); Ch>US (*p*<0.001); Sp>US (*p*=0.048) |
|  | 1 | 29.3 | 34.9 | - | 31.9 | 20.3 |
|  | 2 | 24.1 | 5.8 | - | 3.4 | 5.4 |
| Irritability problems | 0 | 49.6 | 57.2 | - | 80.2 | 84.8 | Br>Sp, US (*p*<0.001);  Ch>Sp, US (*p*<0.001) |
|  | 1 | 30.8 | 32.4 | - | 19 | 11.9 |
|  | 2 | 19.6 | 10.4 | - | 0.8 | 3.3 |
| Br, Brazil; Ch, China; Jp, Japan; Sp, Spain; US, United States.  Bonferroni-corrected p-values resulted from post-hoc comparisons after ordinal logistic regressions. | | | | | | | |

| **Supplementary Table 3. Standardized Item Loadings of Confirmatory Factor Analysis (CFA) for One-Factor Solution of ARI Items for Parent and Youth Report** | | | | | |
| --- | --- | --- | --- | --- | --- |
| **Parent report** |  |  |  |  |  |
| **Item** | **Japan** | **China** | **US** | **Brazil** | **Spain** |
| Annoyed | 0.77 | 0.74 | 0.79 | - | - |
| Often loses temper | 0.89 | 0.87 | 0.98 | - | - |
| Stays angry | 0.86 | 0.58 | 0.86 | - | - |
| Angry most of time | 0.89 | 0.75 | 0.93 | - | - |
| Angry frequent | 0.93 | 0.86 | 0.93 | - | - |
| Loses temper easily | 0.95 | 0.88 | 0.95 | - | - |
| **Youth report** |  |  |  |  |  |
| **Item** | **Japan** | **China** | **US** | **Brazil** | **Spain** |
| Annoyed | - | 0.78 | 0.68 | 0.69 | 0.66 |
| Often loses temper | - | 0.89 | 0.89 | 0.86 | 0.81 |
| Stays angry | - | 0.55 | 0.64 | 0.74 | 0.49 |
| Angry most of time | - | 0.82 | 0.87 | 0.74 | 0.82 |
| Angry frequent | - | 0.90 | 0.82 | 0.77 | 0.70 |
| Loses temper easily | - | 0.84 | 0.86 | 0.83 | 0.80 |
